1 **Title: Spatial and temporal variation in small mammal abundance and diversity under**  
2 **protection, pastoralism and agriculture in the Serengeti Ecosystem, Tanzania.**

3  
4 **Running title: Small mammal abundance and diversity in the Serengeti Ecosystem**

5  
6 Monica T. Shilereyo<sup>1,2\*</sup>, Flora J. Magige<sup>2&</sup>, Joseph O. Ogutu<sup>3&</sup> and Eivlin Røskaft<sup>1&</sup>

7 <sup>1</sup>Department of Biology, Norwegian University of Science and Technology (NTNU) Trondheim  
8 Norway

9 <sup>2</sup>Department of Zoology and Wildlife Conservation, University of Dar es Salaam, Dar es Salaam,  
10 Tanzania

11 <sup>3</sup>Biostatistics Unit, Institute for Crop Science, University of Hohenheim, Stuttgart, Germany,

12 \*Corresponding author: [monicashewona@gmail.com](mailto:monicashewona@gmail.com) (M S)

13  
14 **Abstract**

15 Land use is an important factor influencing animal abundance, species richness and  
16 diversity in both protected and human-dominated landscapes. Increase in human population  
17 and activities intensify changes in habitat structure and hence abundance, species richness and  
18 diversity. We investigated the influences of land use and seasonality on small mammal  
19 abundance, species richness and diversity in 10 habitat types distributed over protected,  
20 agricultural and pastoral landscapes in the Serengeti ecosystem in Tanzania. We used live traps  
21 ( $n = 141$ ) and capture-recapture methods in each of 10 fixed plots distributed across three  
22 landscapes for a total of 28,200 trap nights of effort. Trapping was carried out in the wet and  
23 dry seasons for two consecutive years (April 2017 to October 2018). Small mammal abundance  
24 was higher in the pastoral than in the protected and in the agricultural landscape. Abundance  
25 was higher in the dry than the wet season across all the three landscapes. Species richness and  
26 diversity were higher in the protected, middling in the agricultural and lowest in the pastoral  
27 landscape. The high abundance in the pastoral landscape was due to the numerical dominance  
28 of two species, namely *A. niloticus* in the shrubland and *M. natalensis* in the cropland habitat,  
29 resulting in low species richness and diversity. Abundance was more evenly distributed across  
30 all habitats in the protected area due to less disturbance. The low abundance in the agricultural  
31 landscape, likely reflects disturbance from cultivation. High species richness and diversity in

32 the protected area indicate high habitat heterogeneity while high species diversity in the  
33 agricultural landscape was likely due to high food availability during and soon after harvests.  
34 These findings emphasize the importance of protection in maintaining habitat heterogeneity  
35 for wildlife. They also reaffirm the need for buffer zones around protected areas to cushion  
36 them from intensifying human activities.

37 *Key words.* Small mammals, species richness, diversity, abundance, land use, Serengeti  
38 Ecosystem

39

40

## 41 **Introduction**

42 Human influence on ecosystems is increasing worldwide due to rapid population  
43 growth and increasingly resource-consuming life styles (1). This influence has become so  
44 important that mankind is now and, will likely remain for years to come, the main global driver  
45 of ecological change (2, 3). Human-altered ecosystems made of various settlements, agro-  
46 pastoral and protected areas dominate the terrestrial biosphere, covering more than three  
47 quarters of the total ice-free land areas (4). These alterations to ecosystems have resulted in a  
48 global biodiversity crisis that threatens the world's species and ecosystems (5-7). Today, most  
49 protected areas, set aside to safeguard the remaining global biodiversity, are surrounded by  
50 different human activities making them isolated "islands". This change raises fundamental  
51 questions concerning whether all protected areas will last into the far future given the current  
52 rate of increase in human population and activities (8-12).

53

54 Human activities that cause land use change also act as drivers of biodiversity loss (13).  
55 Agriculture is the dominant land-use activity on the planet and is responsible for altering and  
56 endangering wildlife communities on a massive scale (14, 15). It has transformed native  
57 vegetation into monocultures thereby decreasing biodiversity by homogenising habitats (16).

58 Although, agricultural activities can provide food to some wildlife species, a leading  
59 conservation concern is that agricultural lands alter wildlife communities, favouring generalists  
60 at the expense of specialists (17, 18). On the other hand, livestock grazing, apart from  
61 promoting vegetation regrowth and nutrient enhancement, causes mechanical disturbance,  
62 reduces plant biomass and changes vegetation composition (19). The changes in vegetation  
63 structure can have several knock-on effects on critical ecosystem functions, such as provision  
64 of shelter and food for wild animals, species composition and richness (20-22).

65 Small mammals have long been used as bioindicators and model organisms to study patterns  
66 of species abundance and diversity along different land use gradients (23-26). These studies  
67 show that both grazing and farming activities differentially influence small mammal  
68 community characteristics, such as species richness, diversity and abundance (14, 18, 27-31).

69 In particular, in the Serengeti National Park in Tanzania, small mammal studies have focussed  
70 on species and biotope, diversity and abundance in different habitats and along altitudinal  
71 gradients (32, 33); human-small mammal conflicts (34) and influence of small mammals on  
72 their predator abundances (35). A few studies have also compared protected areas with their  
73 adjacent human-dominated habitats to infer the influence of anthropogenic activities on small  
74 mammal species diversity and abundance (17, 27, 32). Assessments of the influence of human  
75 activities on small mammal species diversity, richness and abundance have produced mixed  
76 results, ranging from positive, negative to neutral effects. This is unsurprising given the  
77 complex and dynamic interactions among ecological, historical, and evolutionary processes  
78 shaping rodent diversity (36).

79 Surprisingly, few studies have sampled small mammals simultaneously between protected  
80 areas and the adjoining human-inhabited areas across seasons (17, 32). This study aims at  
81 expanding upon the earlier studies by assessing spatial and temporal variation in small mammal  
82 species diversity, richness and abundance in the protected and adjoining human-dominated

83 livestock grazing and agricultural landscapes in the Serengeti ecosystem. We address the  
84 following two objectives. First, we quantify the species richness, diversity, abundance and  
85 composition of small mammals in 10 habitats distributed across the three land use types.  
86 Second, we analyse temporal variation (seasonal and interannual) in small mammal abundance  
87 and diversity across the 10 habitats and three land use types. We anticipate that if disturbance  
88 reduces structural and functional habitat heterogeneity then small mammal species diversity  
89 and population density should be highest inside the protected areas, intermediate in the pastoral  
90 lands and lowest in the cultivated areas. In addition, since small mammals exhibit pronounced  
91 reproductive seasonality such that more juveniles are produced during the early dry season  
92 (June and July) we expect to find a higher density of most of the species in the dry than the wet  
93 season because of elevated food abundance linked to higher rainfall in the wet season.  
94 Nevertheless, we anticipate that species should respond to human disturbance in contrasting  
95 ways, such that habitat generalists should be able to colonize disturbed areas faster than habitat  
96 specialists. Thus, we expect the abundance of habitat generalists to be higher than those of  
97 specialists in the more disturbed pastoral and cultivated lands than the protected land.

98

## 99 **Materials and Methods**

### 100 **Study area**

101

102 Data were collected in the Greater Serengeti Ecosystem in Tanzania, East Africa. Our  
103 focus was on the north-eastern Serengeti ecosystem; including the Serengeti National Park (2°  
104 20' S, 34° 50' E) and two adjacent administrative districts, namely the Serengeti (2°15' S,  
105 34°68' E) and Ngorongoro (3°24' S, 35° 48' E). Serengeti National Park protects 14750 km<sup>2</sup> of  
106 tropical savanna ecosystem (37). The park comprises woodlands and open grasslands, besides  
107 other more restricted habitat types (35, 38), with farming and livestock herding practiced  
108 around the ecosystem.

109

110 The study covered mainly the northern part of the Serengeti ecosystem within three main  
111 blocks located along the Mto wa Mbu-Musoma road. This area was selected because it contains  
112 contrasting land use types, including agricultural areas (south west), pastoral and limited  
113 agricultural areas in the south east and the Serengeti National Park situated in-between these  
114 two blocks (Fig. 1). The Mto wa Mbu- Musoma road bisects each of the three blocks, resulting  
115 in 6 sub-blocks; three sub-blocks on either side of the road. Based on habitat type, we selected  
116 two study plots from each of the 6 sub-blocks resulting in 12 study plots. However, only 10  
117 plots were included in the study because the other two plots (wooded grassland and grassland),  
118 situated in Ololosokwan; a pastoralist village with a historical land use conflict with the  
119 Tanzania National Parks, were excluded.

120

121 The climate in the ecosystem is warm and dry, with mean annual temperatures varying between  
122 15 °C and 25 °C (27). The rainy season is bimodal with the short rains spanning November -  
123 January and the long rains covering March - May (39). Rainfall increases from east to west  
124 towards Lake Victoria south to north and south-east to north-west. Rainfall increases along a  
125 south east-north west gradient from 800 mm / year on the dry south-eastern plains to the wet  
126 north-western section (1,050 mm / year) of the Serengeti National Park (40). However, during  
127 this study (April-May and August-September 2017 and 2018) the mean monthly rainfall  
128 averaged 153 mm while the temperature averaged 26 °C.

129

130 **Fig 1. Map of the Serengeti Ecosystem showing the study area.**

131 Green circles with black dots inside indicate the study plots inside and outside the Serengeti  
132 ecosystem

133 **Ethical clearance**

134 The study design was approved by Tanzania Wildlife Research Institute (TAWIRI)  
135 and the permit to conduct research was obtained from Tanzania National Parks (TANAPA).  
136 For the private land, the permit was issued by District Executive Office: Serengeti and  
137 Ngorongoro Districts. All captured small mammals were handled according to the approved  
138 permit and released immediately at the point of capture after observation.

## 139 **Methods**

### 140 **Trapping procedures**

141 Each land use consisted of 4 plots (except the pastoral landscape that had only 2 plots),  
142 each measuring 100 × 100 m and selected in representative habitat types, including grassland,  
143 shrubland, wooded grassland, cropland and riverine forest habitats. Except for the pastoral land  
144 use where only two habitats were sampled (cropland and shrubland), other land use types had  
145 four habitats each; wooded grassland, grassland, cropland and shrubland in the agricultural and  
146 wooded grassland, grassland, riverine forest and shrubland in the national park. A total of 141  
147 small mammal traps (100 Sherman traps, 30 wire mesh traps and 11 bucket pitfall traps) were  
148 set in each of the 10 plots for five consecutive nights and then transferred to the next plot.  
149 Trapping was done twice a year, April -May for the wet season and August and September for  
150 the dry season, for two consecutive years (2017 and 2018). We started trapping on 18<sup>th</sup> April  
151 2017 and stopped on 20<sup>th</sup> September 2018. Trapping started on the pastoral landscape (eastern  
152 part of the Serengeti ecosystem) followed by the protected area and then by the cultivated  
153 landscape (western part of the ecosystem) because the eastern part of the ecosystem receives  
154 relatively low rainfall and so gets drier early compared to the western part. The same pattern  
155 was followed except for one season (wet season 2018) due to logistical constraints, which  
156 forced us to set traps in the protected area after the agricultural landscape.

157

158 Pitfall lines and trap lines were installed to capture mostly shrews and rodents, respectively.  
159 Each plot was assigned one pitfall line consisting of 11 buckets, placed 5 m apart, and buried  
160 in the ground so that the top of the bucket was at the ground level. Each of the 22 buckets per  
161 plot was 26 cm deep and had upper and lower diameters of 30 cm and 26 cm, respectively, and  
162 a 20-litre capacity. The bottom of buckets was pierced with small holes to allow water drainage.  
163 Each pitfall line had a 50 cm-high black plastic drift fence running over the center of each  
164 bucket. These passive and non-baited traps capture animals moving on the habitat floor that  
165 encounter the drift fence and follow it until they fall into a bucket. The pitfall lines were  
166 generally set along straight trails; however, rocks and logs occasionally forced deviations. This  
167 technique has been used with considerable success in other small mammal surveys (41, 42).  
168 For the Sherman traps ( $23 \times 9.5 \times 8$  cm), 10 lines (10 m apart) were developed on the grid.  
169 Sherman traps were arranged along the lines, with a total of 100 traps placed on a  $100 \times 100$  m  
170 plot and spaced 10 m apart. To maximize capture and variety of small mammals caught, 30  
171 wire mesh traps ‘*Mgono*’ were placed in-between the Sherman trap lines. Five wire mesh traps  
172 were placed 20 m apart from each other. These wire mesh traps are widely used in Tanzania  
173 by local hunters, and are funnel-shaped, multi-capture traps made of thin wire. Bait for both  
174 the Sherman and ‘*Mgono*’ traps consisted of freshly fried coconut coated with peanut butter  
175 and mixed with sardines. Traps were rebaited every morning and evening.  
176  
177 Checking of traps was done twice a day, early in the morning and evening. Equal amounts of  
178 time were allocated to both methods, so we use ‘trap-night’ (one trap in operation for one 24-  
179 hr period, 0700 to 0700 hrs, to quantify sampling effort). We refer to the success rate of capture  
180 as trap success and calculate it by dividing the number of individuals captured by the number  
181 of trap-nights and multiplying by 100. Trap success has been recommended as a good measure  
182 of spatial and temporal variation in relative abundance (43). Traps stayed in one plot for 5

183 consecutive days before being taken to the next plot. Using recorded morphometric (external  
184 shape and dimensions) measurements and field guides we identified trapped animals to genus  
185 or species (44). In addition, distinguishing features like species, sex, size, reproductive status,  
186 and presence of scars or particular characteristics were recorded to facilitate individual  
187 identification (45). We marked trapped animals by toe clipping and released them at the points  
188 of capture. After a standardized procedure, involving live trapping and a complete dataset of  
189 small mammal abundance in each land use type, we aimed to ascertain the influence of human  
190 activities on species richness, diversity and abundance.

## 191 **Statistical analyses**

192 To establish the pattern of small mammal response to abiotic and biotic factors, we  
193 analysed variation in abundance, species diversity and richness across the three land use types,  
194 10 habitat types and two seasons. Captures from the same land use and habitat type were pooled  
195 together and represented by the frequency for the particular land use or habitat type. Data were  
196 analysed using *R* version 3.5.2. Reshape and Dplyr packages (46) were used to calculate  
197 descriptive statistics whereas the iNEXT package was used to calculate species diversity and  
198 richness; Chao richness order 0,1 and 2, among the land use types and habitats (47). The  
199 method efficiently uses all the available data to make robust and meaningful comparisons of  
200 species richness between assemblages for a wide range of sample sizes or completeness. Also,  
201 it has been generalized to diversity measures that incorporate species abundances and those  
202 that take into account the evolutionary history among species (48). Hutcheson-t test was used  
203 to test the significance of differences in diversity across the three-land use types and habitat  
204 types.

205 Chi-square goodness-of-fit tests were used to test whether the observed abundances differed  
206 significantly from expectation assuming a uniform distribution. Chi-square tests were followed



207 by the `chisq.multcomp` post hoc test from the `RVAideMemoire` package (49). Abundance in  
208 each of the three land use types were corrected for differences in trapping efforts and the results  
209 presented as the number of small mammals/ 100 trap nights. In this study, the significance level  
210 of 0.05 was adopted.

211

## 212 **Results**

### 213 **Small mammal species richness and diversity**

214 Overall, the species richness ( $S$ ) was 19 species, of which 15 species were recorded in  
215 the NP, 11 in the AG and only 9 in the PA, but the difference in species richness among the  
216 landscapes was not statistically significant ( $\chi^2_2 = 1.6, P = 0.4$ ). The overall diversity ( $H'$ ) was  
217 2.25 and varied across the three landscapes (Fig. 2). Species diversity was twice as high both  
218 in the NP (Hutcheson's t-test,  $t_{513} = 8.0, P < 0.001$ ) and in the AG ( $t_{332} = 7.0, P < 0.001$ ) than  
219 in the PA landscape but was similar between the NP and AG landscapes ( $t_{290} = 1.2, P = 0.22$ ).  
220 In addition, evenness was high in both the AG (85%) and NP (60%) landscapes but low in the  
221 PA (30%) landscape an indication of lower dominance in the NP and AG (S1Table).

222

223

224 **Fig 2. Diversity index ( $\pm$  standard error) for small mammals in three landscapes in the**  
225 **Serengeti ecosystem. AG = Agriculture, NP = National park and PA = Pastoral land use**  
226 **types**

227

228 Species richness and diversity also varied noticeably across different habitats in the same land  
229 use type and across the same habitat in different land use types. Specifically, in the NP species

230 richness was the highest in the wooded grassland followed by the forest, grassland and  
231 shrubland habitats, in decreasing order (Fig. 3a & 3b). However, these apparent differences in  
232 species richness were statistically insignificant ( $\chi^2_3 = 2$ ,  $P = 0.56$ ). In contrast to richness,  
233 species diversity was the highest in the forest, and the lowest in the shrubland habitat. Species  
234 diversity was lower in the shrubland than in the forest ( $t_{332} = 5.6$ ,  $P < 0.001$ ), wooded grassland  
235 ( $t_{129} = 2.66$ ,  $P = 0.0086$ ), and the grassland ( $t_{39} = -2.14$ ,  $P = 0.038$ ) habitats but comparable  
236 between forest and wooded grassland, ( $t_{121} = -1.78$ ,  $P = 0.07$ ) and between forest and grassland  
237 ( $t_{37} = -1.4$ ,  $P = 0.16$ ) habitats (Table A1).

238

239 **Fig 3a. Small mammal species richness in the 10 different habitats across the three land**  
240 **use types. AG = Agriculture, NP = National Park and PA Pastoral landscapes**

241

242 **Fig 3b. Small mammal diversity in the 10 different habitats across the three land use**  
243 **types. AG = Agriculture, NP = National Park and PA Pastoral landscapes**

244

245

246 For the AG land use type, the wooded grassland ( $S = 6$ ) and grassland ( $S = 3$ ) habitats each had  
247 half the number of species found in the same habitat in the NP landscape. Species diversity  
248 was significantly lower in the grassland than in the cropland (Hutcheson  $t$ -test,  $t_{17} = 3.5$ ,  $P =$   
249  $0.0023$ ), shrubland ( $t_{21} = -2.5$ ,  $P = 0.019$ ) or wooded grassland ( $t_{18} = 2.9$ ,  $P = 0.008$ ) habitat.  
250 In the PA, species richness was comparable between the shrubland and cropland habitats ( $\chi^2_1$   
251  $= 0.6$ ,  $P = 0.43$ ). But species diversity was lower in the shrubland habitat in the PA than in the  
252 same habitat in the NP ( $t_{185} = -5.7$ ,  $P < 0.001$ ) or the AG ( $t_{63} = -4.6$ ,  $P < 0.001$ ) landscape (Fig.  
253 3b). In addition, species diversity was similar in the cropland habitat in the PA and AG  
254 landscapes and other habitats in the NP except for the riverine-forest habitat, which had the  
255 highest recorded diversity.

256

## 257 **Small mammal abundance and species composition**

258 An aggregate sampling effort of 28,200 trap-nights spread across all the three land use  
259 types resulted in the trapping of a total of 612 individuals belonging to 19 species and two  
260 orders (Rodentia and Eulipotyphla) of small mammals. Of these, 86% (n = 528) were rodents  
261 whereas 14% (n = 84) were shrews. The number of small mammals captured/100 trap nights  
262 was the highest for the pastoral landscape (PA) (4, n = 277; trap success = 4.91), followed by  
263 the national park (NP) (2, n = 237; trap success = 2.2) and the lowest for the agricultural  
264 landscape (AG) (0.8, n = 98; trap success = 0.84, Table 1).

265

266 **Table 1.** Trap success (100 × number of captures/numbers of trap nights) for each species of  
267 small mammal recorded for each of the three land use types in the Serengeti ecosystem during  
268 the wet and dry seasons of 2017 and 2018. AG and NP had 11,280 trap nights each whereas  
269 PA had 5640 trap nights. A “trap night” is one trap set for one full day.

| Species                      | Trap success |      |      |
|------------------------------|--------------|------|------|
|                              | ‡AG          | NP   | PA   |
| <i>Aethomys sp</i>           | 0.05         | 0.04 | 0.41 |
| <i>Arvicanthis niloticus</i> | 0            | 0.27 | 2.34 |
| <i>Crocidura sp</i>          | 0.1          | 0.6  | 0.04 |
| <i>Dendromus melanotis</i>   | 0.06         | 0.35 | 0    |
| <i>Gerbilliscus vicinus</i>  | 0.195        | 0    | 0.14 |
| <i>Grammomys sp</i>          | 0            | 0.06 | 0    |
| <i>Graphiurus murinus</i>    | 0            | 0.15 | 0.05 |
| <i>Lemniscomys striatus</i>  | 0            | 0.05 | 0    |
| <i>Mastomys natalensis</i>   | 0.06         | 0.05 | 1.56 |
| <i>Mus sorella</i>           | 0.13         | 0.14 | 0.07 |
| <i>Mus sp</i>                | 0.15         | 0.31 | 0.12 |
| <i>Myomys sp</i>             | 0.07         | 0.01 | 0    |

|                           |              |            |             |
|---------------------------|--------------|------------|-------------|
| <i>Otomys angoniensis</i> | 0            | 0          | 0.14        |
| <i>Praomys jacksoni</i>   | 0            | 0.1        | 0.02        |
| <i>Rattus rattus</i>      | 0.02         | 0          | 0           |
| <i>Saccostomus sp</i>     | 0            | 0.05       | 0           |
| <i>Steatomy parvus</i>    | 0            | 0.01       | 0           |
| <i>Zelomys sp</i>         | 0            | 0.01       | 0           |
| <i>Zelotomys sp</i>       | 0            | 0          | 0.02        |
| <b>Total</b>              | <b>0.835</b> | <b>2.2</b> | <b>4.91</b> |

270 ‡AG = Agriculture, NP = Serengeti National Park and PA = Pastoral Landscape.

271

272 Thus, the most common species had the highest trap success in the pastoral land use and the  
 273 lowest in the agricultural areas, with a few exceptions. Notably, the trap successes for *M.*  
 274 *natalensis* and *A. niloticus* were the highest for both the pastoral and agricultural landscapes  
 275 whereas those for *Crocidura sp*, *D. melanotis* and *G. murinus* were the highest for NP. In  
 276 addition, rare species represented by a total of less than 10 captured individuals, were mostly  
 277 restricted to within the confines of the protected area, indicating greater diversity. Specifically,  
 278 the rare species were *Grammomys sp*, *Lemniscomys striatus*, *Praomys jacksoni*, *Saccostomys*  
 279 *sp* and *Zelomys sp*.

280 Trap success differed significantly across the three land use types ( $\chi^2_{36} = 552$ ,  $P < 0.001$ , Fig.  
 281 4). In particular, it was lower for the AG than for either the PA ( $\chi^2_1 = 85.4$ ,  $P < 0.001$ ), or the  
 282 NP landscape ( $\chi^2_1 = 57.6$ ,  $P < 0.001$ ) and higher for the PA than the NP land use ( $\chi^2_1 = 3.1$ ,  $P$   
 283  $= < 0.001$ ). Hence the abundance of small mammals decreased from the PA through the NP to  
 284 the AG landscape. Note that even though the PA had the highest number of small mammals, it  
 285 is species poor because only two species (*A. niloticus* and *M. natalensis*) made the most  
 286 contribution (80%) to the total capture. This contrasts with the NP landscape where the most  
 287 common species (*D. melanotis* and *Crocidura spp*) contributed only 44% to the total capture,  
 288 meaning a more even contribution of species to the overall abundance (S2Table). However,

289 when only either or both species, *A. niloticus* and *M. natalensis*, were excluded from the  
290 analysis, NP had a significantly higher abundance of small mammals than the other two land  
291 use types. When both species were omitted from analysis, the abundance of small mammals  
292 was still significantly different between the land use types ( $\chi^2_2 = 46.2, P < 0.001$ ), but became  
293 higher for the NP than the AG ( $\chi^2_1 = 41.3, P < 0.001$ ) or the PA ( $\chi^2_1 = 93.2, P < 0.001$ )  
294 landscape. Therefore, the pattern of abundance changed such that abundance became the  
295 highest for the NP, middling for the AG and lowest for the PA landscape.

296

297 **Fig 4. Number of small mammals caught per 100 trap nights in each of the three land use**  
298 **types. AG = Agriculture, NP = National Park and PA = Pastoral landscape**

299

300 The abundance of small mammals also varied between different habitats within each land use  
301 type, but the pattern of the differences was inconsistent across the three land use types. For the  
302 NP landscape, the abundance of small mammals varied across habitats ( $\chi^2_3 = 26.8, P = < 0.001$ )  
303 such that it was lower in the grassland than in the wooded grassland, shrubland and forest  
304 habitats (Fig. 5). For the AG, the abundance of small mammals differed significantly across  
305 the four habitats ( $\chi^2_3 = 19.6, P < 0.001$ ) and was higher for the shrubland than for the other  
306 habitats (Fig. 6). However, there was no difference in the abundance of small mammals among  
307 the wooded grassland, cropland and grassland habitats or between the cropland and shrubland  
308 habitats ( $\chi^2_1 = 0.1, P = 0.7$ ). The latter two habitats had the highest abundance of small  
309 mammals in the ecosystem, dominated by *A. niloticus*, which contributed 78% of all the  
310 captures in the shrubland and 46% of *M. natalensis* in the cropland (S2Table).

311

312 **Fig 5. Number of small mammals caught per 100 trap nights (abundance) in each habitat**  
313 **in the NP landscape. Grassland (a) is statistically significantly different from all the other**  
314 **three habitats (b) (\*\*\*) indicates level of significance ( $P < 0.001$ ).**

315

316 **Fig 6. Number of small mammals caught per 100 trap nights (abundance) in each habitat**  
317 **in the AG landscape. Habitats with different numbers of small mammals are connected**  
318 **with a bar and an arrow. \* Indicates level of significance (\* $P < 0.01$ , \*\* $P < 0.01$ ,**  
319 **\*\*\* $P < 0.001$ ).**

320

321 The grassland habitat had a higher abundance of small mammals in the NP than the AG  
322 landscape ( $\chi^2_1 = 6.42$ ,  $P = 0.01$ ). Similarly, small mammal abundance in the shrubland habitats  
323 varied across the three landscapes ( $\chi^2_2 = 63.4$ ,  $P < 0.001$ ) such that it was higher in the PA than  
324 the AG ( $\chi^2_1 = 57.8$ ,  $P < 0.001$ ) or the NP landscape ( $\chi^2_1 = 20.8$ ,  $P < 0.001$ ). Also, the  
325 abundance of small mammals was higher in the shrubland habitat in the NP than in the AG  
326 landscape ( $\chi^2_1 = 10.8$ ,  $P < 0.001$ ). Although the shrubland habitat in the PA had the highest  
327 abundance of small mammals, it had relatively fewer species, with a single species dominating  
328 abundance in the habitat (78% of the total captures were of a single species), than it did in the  
329 NP or AG landscapes (Table A2). For the cropland habitat, the abundance of small mammals  
330 was higher in the PA than the AG landscape ( $\chi^2_1 = 67.6$ ,  $P < 0.001$ ). Likewise, abundance was  
331 higher in the wooded grassland habitat in the NP than the AG landscape ( $\chi^2_1 = 30$ ,  $P = 0.001$ ).

332

333 Small mammal abundance also varied interannually and seasonally (Fig. 7). Across all species,  
334 abundance was higher in 2018 than 2017 ( $\chi^2_1 = 37.7$ ,  $P < 0.001$ ) and in the dry than the wet

335 season across both 2017 and 2018 ( $\chi^2_1 = 20.5, P = < 0.001$ ). The seasonal variation in  
336 abundance persisted even when the two years were considered separately such that abundance  
337 was higher in the dry than the wet season in both 2017 ( $\chi^2_1 = 20.4, P < 0.001$ ) and 2018 ( $\chi^2_1 =$   
338 17.424,  $P < 0.001$ ). The number of individual species also varied seasonally with contrasts  
339 apparent across species. Collectively, *A. niloticus* ( $\chi^2_1 = 27.273, P < 0.001$ ), *M. natalensis* ( $\chi^2_1 =$   
340 = 56,  $P < 0.001$ ) and *G. vicinus* ( $\chi^2_1 = 11.8, P < 0.001$ ) were more abundant in the dry than  
341 the wet season. By contrast *G. murinus* ( $\chi^2_1 = 5, P = 0.02$ ) and *Crocidura spp* ( $\chi^2_1 = 3.8571, P$   
342 = 0.04) were more abundant in the wet than the dry season. All the other species (*Saccostomus*  
343 *sp.*, *O. angoniensis*, *S. parvus*, *Zelomys sp.*, *Zelotomys sp.* and *P. jacksoni*) had lower capture  
344 rates and were mostly captured in the dry season in 2018.

345

346 **Fig 7. Percentage of all the small mammals caught in each season during 2017-2018 in the**  
347 **Serengeti ecosystem. Percentages are used here because the total number of trap nights**  
348 **was the same for both seasons.**

349

## 350 Discussion

### 351 Small mammal species richness and diversity

352

353 As expected, species richness and diversity of small mammals were higher inside the  
354 NP than in either the AG or PA landscape. The higher diversity in the NP demonstrates that  
355 protection is crucial in safeguarding wildlife. This is further reinforced by the observation that  
356 most of the species that had low trap success occurred in the NP, indicating speciality.  
357 Furthermore, the NP is the least modified by human activities and thus has high vegetation  
358 heterogeneity and intactness, crucial to supporting a variety of small mammal species. Habitat

359 heterogeneity is one of the most important factors influencing small mammal richness and  
360 diversity (50, 51). These findings concur with those of Magige and Senzota (2006) who also  
361 recorded the highest small mammal diversity in the protected landscape. They are also  
362 consistent with the general notion that greater habitat diversity is associated with higher species  
363 diversity (52)

364

365 Similarly, the higher species diversity for the NP landscape reflects the importance of  
366 protection in maintaining high habitat and species diversity in ecosystems. High habitat  
367 diversity is essential to high species diversity because the presence of habitat specialists is  
368 conditional on the presence of their favoured habitat types. Thus, for example, the riverine  
369 forest habitat, harbored mainly *G. murinus* and *Grammomys spp*, both of which prefer trees  
370 and intact forest cover for nesting in the Serengeti. The selection of the riverine forest habitat  
371 by *G. murinus* has also been noted previously (53) and is indicative of habitat specificity. The  
372 impact of livestock grazing in the shrubland habitat in the PA landscape was manifested in the  
373 lower small mammal species diversity than in the other habitats. Moreover, the relatively lower  
374 evenness (30%) in the PA landscape reaffirms the role of livestock grazing as one of the  
375 anthropogenic activities that alter vegetation structure and promote generalist species over  
376 habitat specialists. So, how does livestock grazing reduce small mammal species diversity?  
377 One plausible mechanism is that grazing increases shrub cover and patches and hence nesting  
378 and refuge sites for small mammals but reduces vegetation diversity and ground cover (54).  
379 Thus, continuous grazing decreases small mammal species diversity by reducing their food  
380 diversity and increasing predation risk (29, 55). In consequence, human activities, such as  
381 livestock grazing, are detrimental to ecosystems as they reduce small mammal species  
382 diversity, yet small mammals play a central role in food webs and other ecosystem services.

383



## 384 **Small mammal abundance and species composition**

385           The fact that small mammal abundance was the highest in the pastoral, middling in the  
386 protected and the lowest in the agricultural landscape deviates from our initial expectation that  
387 abundance should be the highest in the park, intermediate in pastoral and the least in the  
388 agricultural landscape. This deviation is primarily attributable to the dominance of *A. niloticus*  
389 and *M. natalensis* in the pastoral landscape. When either one or both species (*A. niloticus* and  
390 *M. natalensis*) are excluded from analysis, then the results conform to our prediction, implying  
391 that the two numerically dominant species make the pastoral landscape to have more abundant  
392 but fewer species. The latter two species are generalists able to produce many young, attain  
393 high densities in relatively short time frames and colonize new areas (56, 57). The numerical  
394 dominance of these species suggests that human activities might have modified habitats in  
395 pastoral lands, rendering them suitable for a few generalist species (14, 17).

396  
397 Small mammal abundance also varied across habitats and was the highest in the shrubland  
398 habitat in the pastoral landscape. Notably, *A. niloticus* (78%) was the most abundant species in  
399 the shrubland habitat in the pastoral landscape where sustained livestock grazing may have  
400 resulted in increased woody plant (shrub) cover (58, 59) at the expense of herbaceous plant  
401 cover. This accords with the observation that heavy livestock grazing can reduce plant species  
402 diversity and homogenize natural habitats (29, 54, 60). By increasing shrub cover and reducing  
403 primary productivity of the above-ground biomass, livestock grazing can negatively affect  
404 plant diversity and food availability for small mammals. On the other hand, small mammals  
405 were also abundant in the cropland habitat in the pastoral landscape due primarily to the  
406 numerical dominance of *M. natalensis* in the post-harvest (dry season) period when food and  
407 cover are still relatively plentiful. This species is common in croplands due to its feeding

408 ecology, generalist behaviour and high food availability in this habitat after harvests (18, 27,  
409 56, 57).

410

411 In contrast, the cropland habitat had significantly lower overall abundance in the agricultural  
412 than the pastoral landscape due primarily to differences in the cropping systems used in the  
413 two landscapes. In the pastoral landscape, crop farms are fenced to prevent livestock from  
414 raiding crops. The vegetation fringing the fences provide habitats for small mammals. In  
415 addition, during harvests, crop farmers in the pastoral landscape often leave some maize stocks  
416 and cobs on the farm for livestock. Also, after harvests farmers in the pastoral landscape take  
417 relatively longer time before preparing land by hand hoes for the next planting season. Thus,  
418 the land remains relatively intact for some months. By contrast, fencing farms is not common  
419 in the agricultural landscape, and it typically takes less than a month to prepare land by oxen  
420 and replant because most of the farmers cultivate crops for cash income (Pers. Obs & comm.  
421 2018). Thus, the cropping system used in the cropland habitat in the pastoral landscape likely  
422 contributed to a relatively stable supply and availability of food and shelter for the small  
423 mammal species after harvests. Preparing land and replanting soon after harvesting, as done in  
424 the cropland in the agricultural landscape, reduces shelter and likely exposes small mammals  
425 to high predation risk, forcing them to seek safer habitats elsewhere. Changes in the quality  
426 and quantity of resources associated with cultivation can thus greatly influence the population  
427 size of small mammals. Specifically, the land preparation methods used in the cropland habitat  
428 in the pastoral landscape may favour *M. natalensis* species because it disturbs the habitat much  
429 less than a tractor or oxen does (61).

430 The higher abundance of small mammals in both the wooded grassland and grassland habitats  
431 in the NP than the AG landscape may reflect greater habitat heterogeneity in the NP landscape  
432 because of less human activities (17). Specifically, the higher abundance of *D. melanotis* in the

433 wooded grassland and shrubland habitats in the NP than in the AG landscape could be due to  
434 advanced locomotor adaptations and mode of foraging of *D. melanotis*. This species is an agile  
435 climber that prefers tall vegetation (62) prevalent in the NP landscape. Although it occurs in  
436 both relatively pristine and human-dominated habitats, disturbance such as from agriculture,  
437 may cause their temporal migration (63). Thus, the NP is likely safer than the human-  
438 dominated landscapes besides providing tall vegetation habitats favoured by this species.

439

440 The higher abundance of small mammals in the dry than the wet season is consistent with the  
441 expectation. Seasonality alters vegetation cover and food availability and thus small mammal  
442 abundance (17, 57). Food and shelter rank among the key factors that determine small  
443 mammals abundance, hence the higher abundance in the dry season indicates elevated food  
444 availability due to high rainfall in the preceding wet season (64, 65). Surprisingly, *Crocidura*  
445 *spp* and *G. murinus* were more abundant in the wet than the dry season. This contradicts  
446 findings of two previous studies which reported higher abundances of both species in the dry  
447 than the wet season in this ecosystem (66, 67), implying substantial interannual variation in  
448 abundance. Such interannual fluctuations in abundance may be linked to a similar underlying  
449 variation in rainfall and hence in food availability.

450

451 In aggregate, these results support the notion that human activities, such as grazing and  
452 agriculture, homogenize habitats. This is demonstrated by the higher abundance of *A. niloticus*  
453 in the shrubland and *M. natalensis* in the cropland habitat. Both species are habitat generalists  
454 able to expand their home ranges depending on seasonal food availability and to persist in  
455 disturbed areas (57, 68, 69). This conforms with the general view that human-dominated  
456 habitats should harbour many generalist small mammal species (Byrom et al., 2015). Thus, by

457 creating habitats that favor generalists at the expense of specialist species, human activities  
458 modify ecosystem function and suitability for small mammal communities.

459

## 460 **Conclusions and conservation implications**

461 Human activities apparently exert deleterious effects on small mammals through  
462 reducing habitat suitability, resulting in reduced abundance, species richness and diversity. The  
463 protected area had higher species richness and diversity than the adjoining agricultural or  
464 pastoral landscapes, implying better protection of small mammals. Agricultural landscapes  
465 support less abundant but more diverse small mammal communities than pastoral landscapes  
466 due to greater food and shelter availability post-harvest than in the pastoral lands. Pastoral lands  
467 had more abundant but less diverse small mammal communities. This implicates structural  
468 habitat modification and loss of habitat heterogeneity. Loss of habitat heterogeneity due to  
469 human activities is associated with the loss of important habitats for small mammal species and  
470 hence with the loss of many small mammal species and the ecological services they provide.  
471 These findings reaffirm the importance of protection as a strategy for conserving the  
472 abundance, richness and diversity of small mammal species and can aid conservationists in  
473 diagnosing healthy ecosystems.

474

## 475 **Acknowledgements**

476 We thank the Tanzania National Parks (TANAPA) and the Tanzania Wildlife Research  
477 Institute (TAWIRI) for permission to conduct this study.

478

479

480

## 481 **References**

- 482 1. Macchi M, editor Mountains of the World: ecosystem services in a time of global and climate  
483 change. Seizing opportunities: meeting challenges. Mountains of the World: ecosystem services in a  
484 time of global and climate change Seizing opportunities: meeting challenges; 2010: International  
485 Centre for Integrated Mountain Development (ICIMOD).
- 486 2. Andrés Viña EGF, Syed Ainul, Hussain LM, Peter Akong Minang, Nidhi, Nagabhatla. IPBES  
487 Global Assessment on Biodiversity and Ecosystem Services. 2019:245.
- 488 3. Sala OE, Chapin FS, Armesto JJ, Berlow E, Bloomfield J, Dirzo R, et al. Global biodiversity  
489 scenarios for the year 2100. *science*. 2000;287(5459):1770-4.
- 490 4. Ellis EC, Ramankutty N. Putting people in the map: anthropogenic biomes of the world.  
491 *Frontiers in Ecology and the Environment*. 2008;6(8):439-47.
- 492 5. Pimm SL, Russell GJ, Gittleman JL, Brooks TM. The future of biodiversity. *Science*.  
493 1995;269(5222):347-50.
- 494 6. Butchart SH, Walpole M, Collen B, Van Strien A, Scharlemann JP, Almond RE, et al. Global  
495 biodiversity: indicators of recent declines. *Science*. 2010;1187512.
- 496 7. Ricketts TH, Dinerstein E, Boucher T, Brooks TM, Butchart SH, Hoffmann M, et al. Pinpointing  
497 and preventing imminent extinctions. *Proceedings of the National Academy of Sciences*.  
498 2005;102(51):18497-501.
- 499 8. Mora C, Sale PF. Ongoing global biodiversity loss and the need to move beyond protected  
500 areas: a review of the technical and practical shortcomings of protected areas on land and sea.  
501 *Marine ecology progress series*. 2011;434:251-66.
- 502 9. DeFries R, Hansen A, Newton AC, Hansen MC. Increasing isolation of protected areas in  
503 tropical forests over the past twenty years. *Ecological applications*. 2005;15(1):19-26.
- 504 10. Wittemyer G, Elsen P, Bean WT, Burton ACO, Brashares JS. Accelerated human population  
505 growth at protected area edges. *Science*. 2008;321(5885):123-6.
- 506 11. Kiffner C, Nagar S, Kollmar C, Kioko J. Wildlife species richness and densities in wildlife  
507 corridors of Northern Tanzania. *Journal for nature conservation*. 2016;31:29-37.
- 508 12. Hartter J, Ryan SJ, MacKenzie CA, Goldman A, Dowhaniuk N, Palace M, et al. Now there is no  
509 land: a story of ethnic migration in a protected area landscape in western Uganda. *Population and  
510 Environment*. 2015;36(4):452-79.
- 511 13. Pereira HM, Leadley PW, Proença V, Alkemade R, Scharlemann JP, Fernandez-Manjarrés JF,  
512 et al. Scenarios for global biodiversity in the 21st century. *Science*. 2010;330(6010):1496-501.
- 513 14. Hurst ZM, McCleery RA, Collier BA, Fletcher Jr RJ, Silvy NJ, Taylor PJ, et al. Dynamic edge  
514 effects in small mammal communities across a conservation-agricultural interface in Swaziland. *PLoS  
515 One*. 2013;8(9):e74520.
- 516 15. Hurst ZM, McCleery RA, Collier BA, Silvy NJ, Taylor PJ, Monadjem A. Linking changes in small  
517 mammal communities to ecosystem functions in an agricultural landscape. *Mammalian Biology-  
518 Zeitschrift für Säugetierkunde*. 2014;79(1):17-23.
- 519 16. Michel N, Burel F, Butet A. How does landscape use influence small mammal diversity,  
520 abundance and biomass in hedgerow networks of farming landscapes? *Acta Oecologica*.  
521 2006;30(1):11-20.
- 522 17. Byrom AE, Nkwabi AJ, Metzger K, Mduma SA, Forrester GJ, Ruscoe WA, et al. Anthropogenic  
523 stressors influence small mammal communities in tropical East African savanna at multiple spatial  
524 scales. *Wildlife Research*. 2015;42(2):119-31.
- 525 18. Caro T. Species richness and abundance of small mammals inside and outside an African  
526 national park. *Biological Conservation*. 2001;98(3):251-7.
- 527 19. Schmidt NM, Olsen H, Bildsøe M, Sluydts V, Leirs H. Effects of grazing intensity on small  
528 mammal population ecology in wet meadows. *Basic and Applied Ecology*. 2005;6(1):57-66.

- 529 20. Mayer C, Soka G, Picker M. The importance of monkey beetle (Scarabaeidae: Hopliini)  
530 pollination for Aizoaceae and Asteraceae in grazed and ungrazed areas at Paulshoek, Succulent  
531 Karoo, South Africa. *Journal of Insect conservation*. 2006;10(4):323.
- 532 21. Eccard J, Walther R, Milton S. How livestock grazing affects vegetation structures and small  
533 mammal distribution in the semi-arid Karoo. *Journal of Arid Environments*. 2000;46(2):103-6.
- 534 22. Blaum N, Rossmanith E, Jeltsch F. Land use affects rodent communities in Kalahari savannah  
535 rangelands. *African Journal of Ecology*. 2007;45(2):189-95.
- 536 23. Glennon MJ, Porter WF. Impacts of land-use management on small mammals in the  
537 Adirondack Park, New York. *Northeastern Naturalist*. 2007;14(3):323-42.
- 538 24. Wearn OR, Rowcliffe JM, Carbone C, Pfeifer M, Bernard H, Ewers RM. Mammalian species  
539 abundance across a gradient of tropical land-use intensity: A hierarchical multi-species modelling  
540 approach. *Biological Conservation*. 2017;212:162-71.
- 541 25. Gbogbo F, Tabiri K, Yahaya M. Diversity and abundance of small mammals along a  
542 disturbance gradient on a university campus in Ghana. *International Journal of Ecology &  
543 Development™*. 2017;32(1):54-65.
- 544 26. Michel N, Burel F, Legendre P, Butet A. Role of habitat and landscape in structuring small  
545 mammal assemblages in hedgerow networks of contrasted farming landscapes in Brittany, France.  
546 *Landscape Ecology*. 2007;22(8):1241-53.
- 547 27. Magige F. Variation of small mammal populations across different habitat types in the  
548 Serengeti ecosystem. *Tanzania Journal of Science*. 2016;42(1):15-23.
- 549 28. Gentili S, Sigura M, Bonesi L. Decreased small mammals species diversity and increased  
550 population abundance along a gradient of agricultural intensification. *Hystrix, the Italian Journal of  
551 Mammalogy*. 2014;25(1):39-44.
- 552 29. Cao C, Shuai L-Y, Xin X-P, Liu Z-T, Song Y-L, Zeng Z-G. Effects of cattle grazing on small  
553 mammal communities in the Hulunber meadow steppe. *PeerJ*. 2016;4:e2349.
- 554 30. Rickart EA, Bienek KG, Rowe RJ. Impact of livestock grazing on plant and small mammal  
555 communities in the Ruby Mountains, northeastern Nevada. *Western North American Naturalist*.  
556 2013;73(4):505-15.
- 557 31. Bösing BM, Haarmeyer DH, Dengler J, Ganzhorn JU, Schmiedel U. Effects of livestock grazing  
558 and habitat characteristics on small mammal communities in the Knersvlakte, South Africa. *Journal  
559 of Arid Environments*. 2014;104:124-31.
- 560 32. Magige F, Senzota R. Abundance and diversity of rodents at the human-wildlife interface in  
561 western Serengeti, Tanzania. *African Journal of Ecology*. 2006;44(3):371-8.
- 562 33. Magige FJ. Rodent species diversity in relation to altitudinal gradient in Northern Serengeti,  
563 Tanzania. *African Journal of Ecology*. 2013;51(4):618-24.
- 564 34. Magige F. Human-wildlife interaction in Serengeti and Ngorongoro districts of Tanzania: a  
565 case study on small mammals. *Tanzania Journal of Science*. 2012;38(1):95-103.
- 566 35. Byrom AE, Craft ME, Durant SM, Nkwabi AJ, Metzger K, Hampson K, et al. Episodic outbreaks  
567 of small mammals influence predator community dynamics in an east African savanna ecosystem.  
568 *Oikos*. 2014;123(8):1014-24.
- 569 36. Rahbek C. The relationship among area, elevation, and regional species richness in  
570 neotropical birds. *The American Naturalist*. 1997;149(5):875-902.
- 571 37. Sinclair A. Integrating conservation in human and natural systems. In 'Serengeti III: Human  
572 Impacts on Ecosystem Dynamics'. (Eds ARE Sinclair, C. Packer, SAR Mduma and JM Fryxell.) pp. 471-  
573 495. University of Chicago Press: Chicago; 2008.
- 574 38. Reed D, Anderson T, Dempewolf J, Metzger K, Serneels S. The spatial distribution of  
575 vegetation types in the Serengeti ecosystem: the influence of rainfall and topographic relief on  
576 vegetation patch characteristics. *Journal of Biogeography*. 2009;36(4):770-82.
- 577 39. Norton-Griffiths M, Herlocker D, Pennycuik L. The patterns of rainfall in the Serengeti  
578 ecosystem, Tanzania. *African Journal of Ecology*. 1975;13(3-4):347-74.

- 579 40. Campbell K, Hofer H. People and wildlife: spatial dynamics and zones of interaction.  
580 Serengeti II. 1995:534-70.
- 581 41. Stanley WT, Hutterer R. Differences in abundance and species richness between shrews and  
582 rodents along an elevational gradient in the Udzungwa Mountains, Tanzania. *Acta Theriologica*.  
583 2007;52(3):261-75.
- 584 42. Stanley WT, Goodman SM, Newmark WD. Small mammal inventories in the East and West  
585 Usambara Mountains, Tanzania. 1. Study areas, methodologies, and general results. *Fieldiana Life*  
586 *and Earth Sciences*. 2011:1-17.
- 587 43. Cavia R, Cueto GR, Suárez OV. Techniques to estimate abundance and monitoring rodent  
588 pests in urban environments. *Integrated pest management and pest control-current and future*  
589 *tactics*: IntechOpen; 2012.
- 590 44. Kingdon J. *The Kingdon field guide to African mammals*: Bloomsbury Publishing; 2015.
- 591 45. Graham IM, Lambin X. The impact of weasel predation on cyclic field-vole survival: the  
592 specialist predator hypothesis contradicted. *Journal of Animal Ecology*. 2002;71(6):946-56.
- 593 46. Wickham H, Wickham MH. Package 'plyr'. Obtenido de [https://cran](https://cran.rproject.org/web/packages/dplyr/dplyr.pdf) rproject  
594 [org/web/packages/dplyr/dplyr.pdf](https://cran.rproject.org/web/packages/dplyr/dplyr.pdf). 2018.
- 595 47. Hsieh T, Ma K, Chao A, Hsieh MT. Package 'iNEXT'. URL [http://chao](http://chao.stat.nthu.edu.tw/blog/software-download/) stat nthu edu  
596 [tw/blog/software-download/](http://chao.stat.nthu.edu.tw/blog/software-download/)(accessed 228 2017). 2016.
- 597 48. Chao A, Gotelli NJ, Hsieh T, Sander EL, Ma K, Colwell RK, et al. Rarefaction and extrapolation  
598 with Hill numbers: a framework for sampling and estimation in species diversity studies. *Ecological*  
599 *Monographs*. 2014;84(1):45-67.
- 600 49. Hervé M, Hervé MM. Package 'RVAideMemoire'. 2019.
- 601 50. Datiko D, Bekele A. Species composition and abundance of small mammals in Chebera-  
602 Churchura National Park, Ethiopia. *Journal of Ecology and the Natural Environment*. 2013;5(6):95-  
603 102.
- 604 51. Cramer MJ, Willig MR. Habitat heterogeneity, habitat associations, and rodent species  
605 diversity in a sand-shinnery-oak landscape. *Journal of mammalogy*. 2002;83(3):743-53.
- 606 52. MacArthur RH, MacArthur JW. On bird species diversity. *Ecology*. 1961;42(3):594-8.
- 607 53. Madikiza ZJ, Bertolino S, Baxter RM, Do Linh San E. Seasonal, sexual and age-related  
608 variations in the live-trapping success of woodland dormice *Graphiurus murinus*. *Zoological Studies*.  
609 2010;49(6):797-805.
- 610 54. Blaum N, Rossmann E, Popp A, Jeltsch F. Shrub encroachment affects mammalian carnivore  
611 abundance and species richness in semiarid rangelands. *Acta Oecologica*. 2007;31(1):86-92.
- 612 55. Fey K, Banks PB, Korpimäki E, editors. Different microhabitat preferences of field and bank  
613 voles under manipulated predation risk from an alien predator. *Annales Zoologici Fennici*; 2006:  
614 JSTOR.
- 615 56. Coetzee CG. The biology, behaviour, and ecology of *Mastomys natalensis* in southern Africa.  
616 *Bulletin of the World Health Organization*. 1975;52(4-6):637.
- 617 57. Mulungu LS, Themba'alilahlwa AM, Massawe AW, Kennis J, Crauwels D, Eiseb S, et al. Dietary  
618 differences of the multimammate mouse, *Mastomys natalensis* (Smith, 1834), across different  
619 habitats and seasons in Tanzania and Swaziland. *Wildlife Research*. 2011;38(7):640-6.
- 620 58. Ofori BY, Garshon RA, Jones K, Daniel K. Preliminary checklist and aspects of the ecology of  
621 small mammals at the University of Ghana Botanical Garden, Accra Plains, Ghana. 2014.
- 622 59. Okullo P, Greve PM, Moe SR. Termites, large herbivores, and herbaceous plant dominance  
623 structure small mammal communities in savannahs. *Ecosystems*. 2013;16(6):1002-12.
- 624 60. Weber GE, Jeltsch F. Long-term impacts of livestock herbivory on herbaceous and woody  
625 vegetation in semiarid savannas. *Basic and Applied Ecology*. 2000;1(1):13-23.
- 626 61. Massawe A, Rwamugira W, Leirs H, Makundi R, Mulungu LS. Abstract. *African Journal of*  
627 *Ecology*. 2007;45(3):293-301.
- 628 62. Skinner JD, Chimimba CT. *The mammals of the southern African sub-region*: Cambridge  
629 *University Press*; 2005.

- 630 63. Child MF, Monadjem, A. *Dendromus melanotis*. The IUCN Red List of Threatened  
631 Species. 2016.
- 632 64. Lima M, Stenseth NC, Leirs H, Jaksic FM. Population dynamics of small mammals in semi-arid  
633 regions: a comparative study of demographic variability in two rodent species. *Proceedings of the*  
634 *Royal Society of London B: Biological Sciences*. 2003;270(1528):1997-2007.
- 635 65. Crespin L, Papillon Y, Abdoulaye D, Granjon L, Sicard B. Annual flooding, survival and  
636 recruitment in a rodent population from the Niger River plain in Mali. *Journal of Tropical Ecology*.  
637 2008;24(4):375-86.
- 638 66. Timbuka C, Kabigumila J. Diversity and abundance of small mammals in the Serengeti Kopjes,  
639 Tanzania. *Tanzania Journal of Science*. 2006;32(1):1-12.
- 640 67. Lamani S. Diet and microhabitat use of the woodland dormouse *Graphiurus murinus* at the  
641 Great Fish River Reserve, Eastern Cape, South Africa: University of Fort Hare; 2014.
- 642 68. Mulungu LS, Massawe AW, Kennis J, Crauwels D, Eiseb S, Mahlaba TaA, et al. Differences in  
643 diet between two rodent species, *Mastomys natalensis* and *Gerbilliscus vicinus*, in fallow land  
644 habitats in central Tanzania. *African Zoology*. 2011;46(2):387-92.
- 645 69. Odhiambo RO, Makundi RH, Leirs H, Verhagen R. Dietary selection in *Mastomys natalensis*  
646 (Rodentia: Muridae) in the maize agro-ecosystems of central and southwestern Tanzania. *Walter de*  
647 *Gruyter*; 2008.

648

## 649 **Supporting information**

650 **S1 Table. Small mammal species richness and diversity and the significance of tests of their**  
651 **differences between habitats in three land use types in the Serengeti Ecosystem between 2017**  
652 **and 2018. AG = Agriculture, NP = National Park and PA Pastoral landscape**

653 H'= Species diversity, S = Species richness, ns = non-significant, n = number of samples

654 \* Indicates level of significance \*\*P<0.01, \*\*\*P<0.001).

655 **S2 Table. Relative abundance (number of individuals of a species caught in a habitat**  
656 **divided by total number of individuals of all species caught in the habitat × 100) of small**  
657 **mammal species captured in 10 different habitats in the Serengeti ecosystem, Tanzania,**  
658 **during the wet and dry seasons of 2017 and 2018.**

659 †AG = Agriculture, NP = National Park, PA = Pastoral Landscape, Crop = cropland, Sh = Shrubland,  
660 WG = Wooded grassland, Gr= Grassland and For = Riverine forest.

661

662



bioRxiv preprint doi: <https://doi.org/10.1101/727206>; this version posted August 6, 2019. The copyright holder for this preprint (which was not certified by peer review) is the author/funder, who has granted bioRxiv a license to display the preprint in perpetuity. It is made available under aCC-BY 4.0 International license.

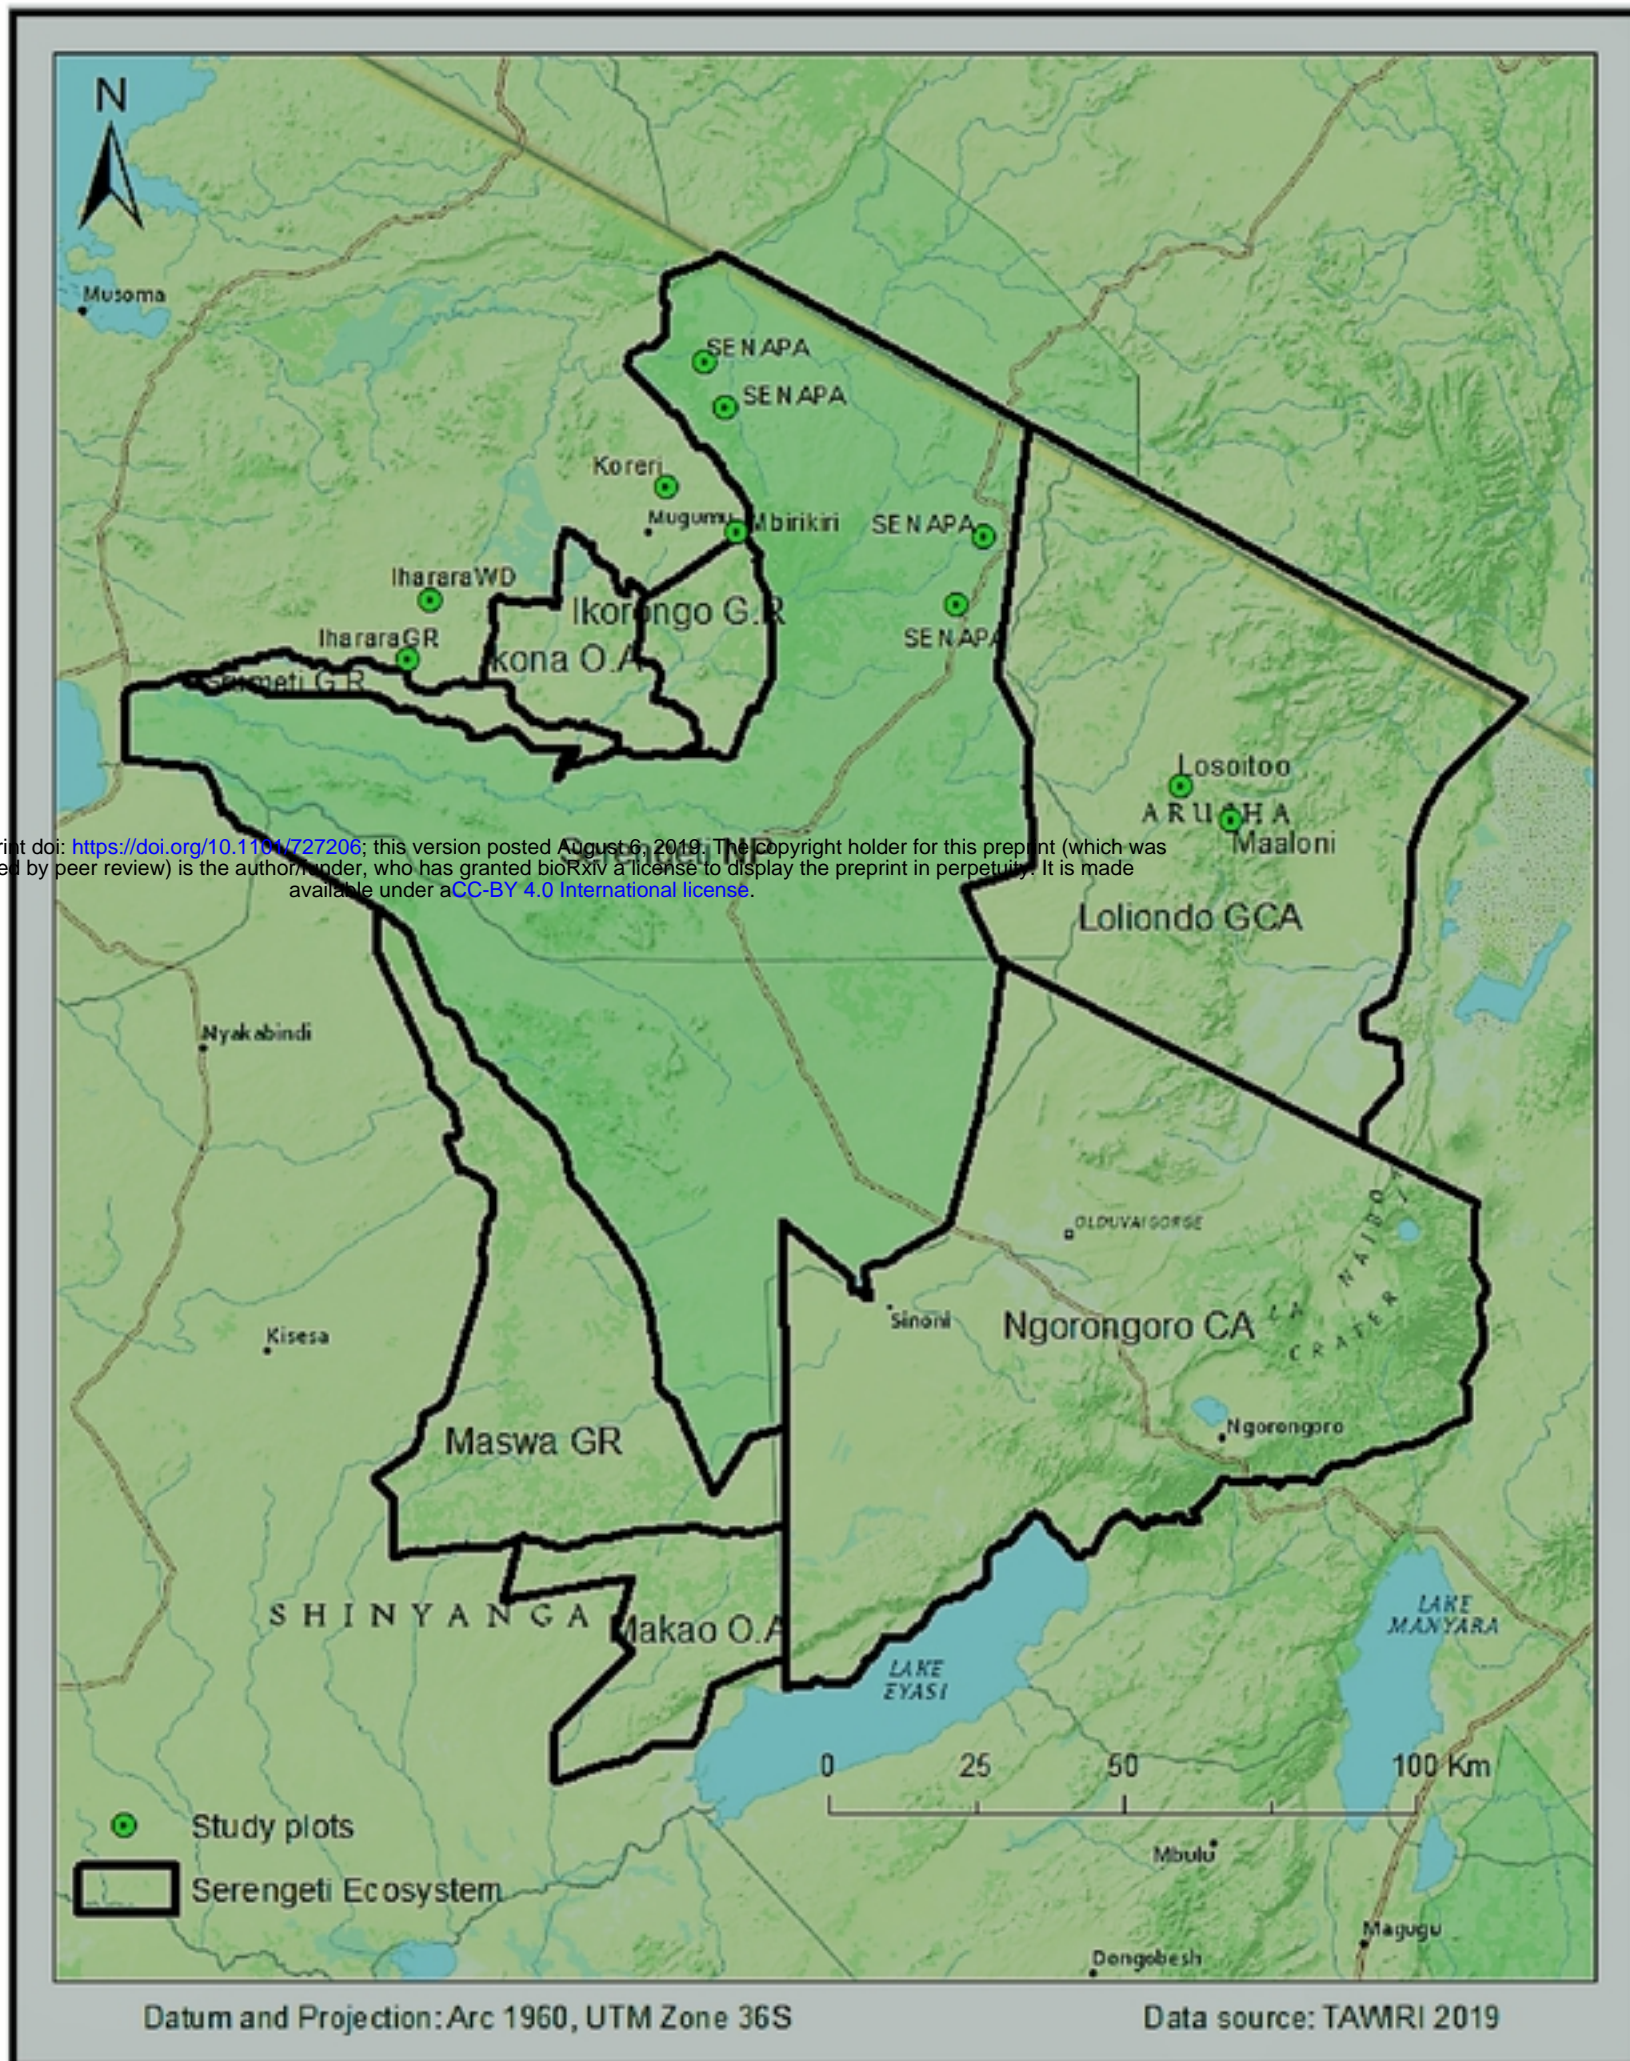

Figure

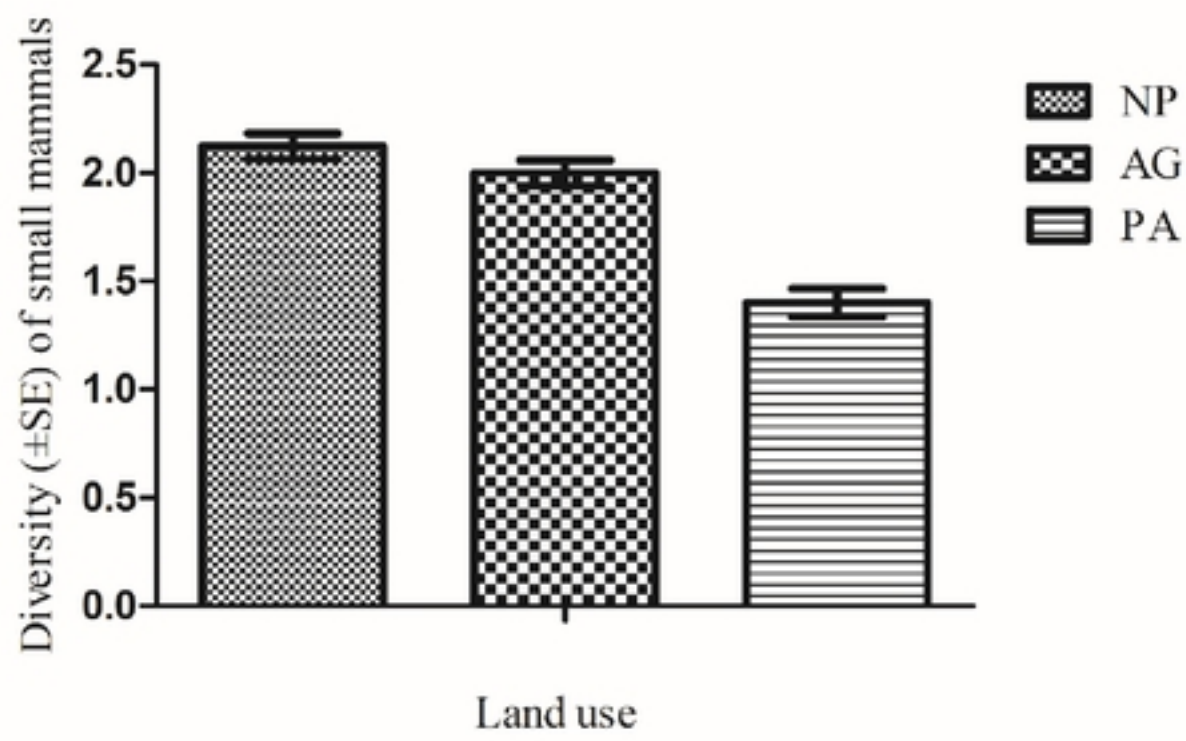

bioRxiv preprint doi: <https://doi.org/10.1101/727206>; this version posted August 6, 2019. The copyright holder for this preprint (which was not certified by peer review) is the author/funder, who has granted bioRxiv a license to display the preprint in perpetuity. It is made available under aCC-BY 4.0 International license.

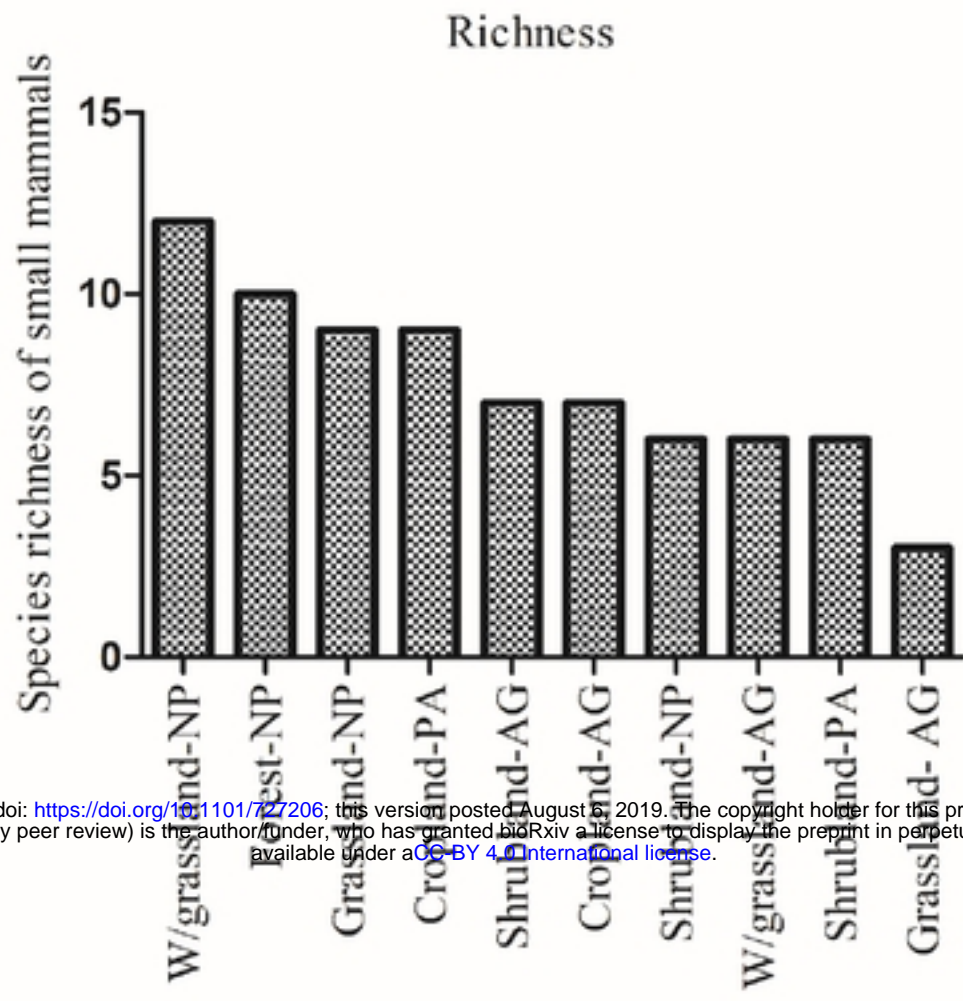

bioRxiv preprint doi: <https://doi.org/10.1101/727206>; this version posted August 1, 2019. The copyright holder for this preprint (which was not certified by peer review) is the author/funder, who has granted bioRxiv a license to display the preprint in perpetuity. It is made available under aCC-BY 4.0 International license.

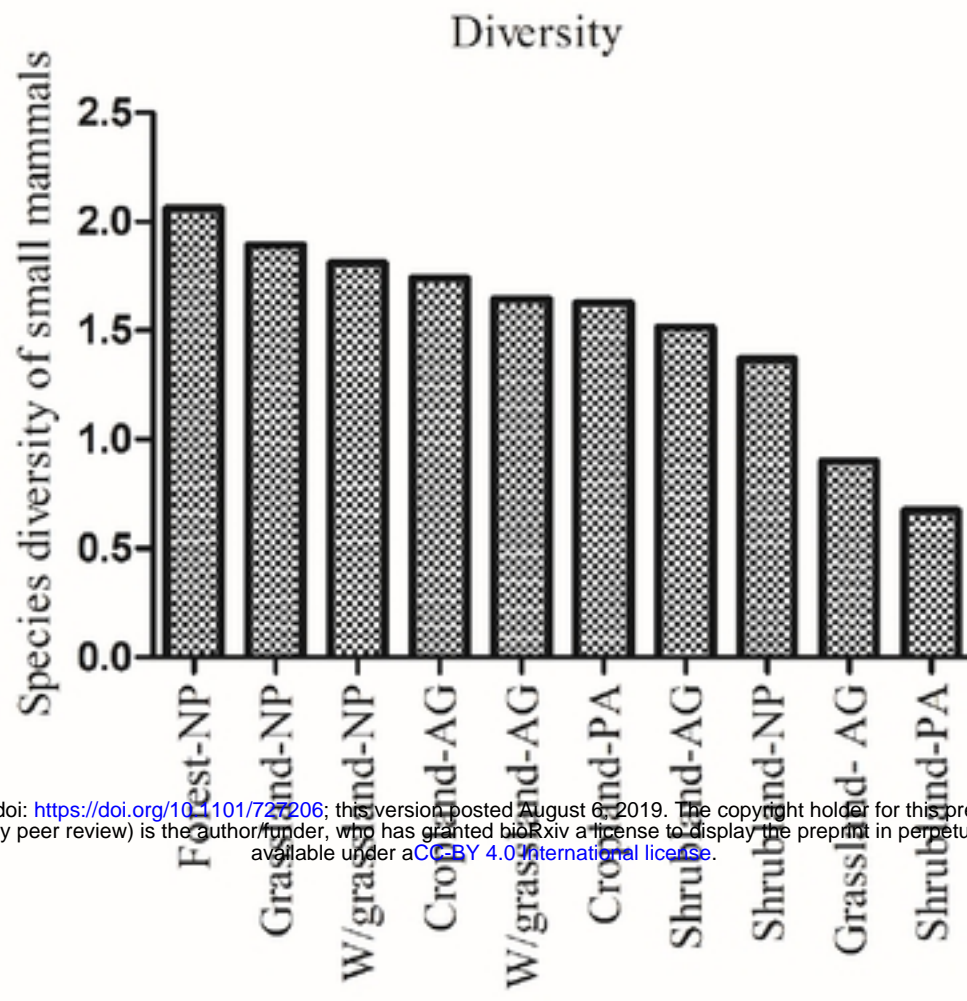

bioRxiv preprint doi: <https://doi.org/10.1101/727206>; this version posted August 6, 2019. The copyright holder for this preprint (which was not certified by peer review) is the author/funder, who has granted bioRxiv a license to display the preprint in perpetuity. It is made available under aCC-BY 4.0 International license.

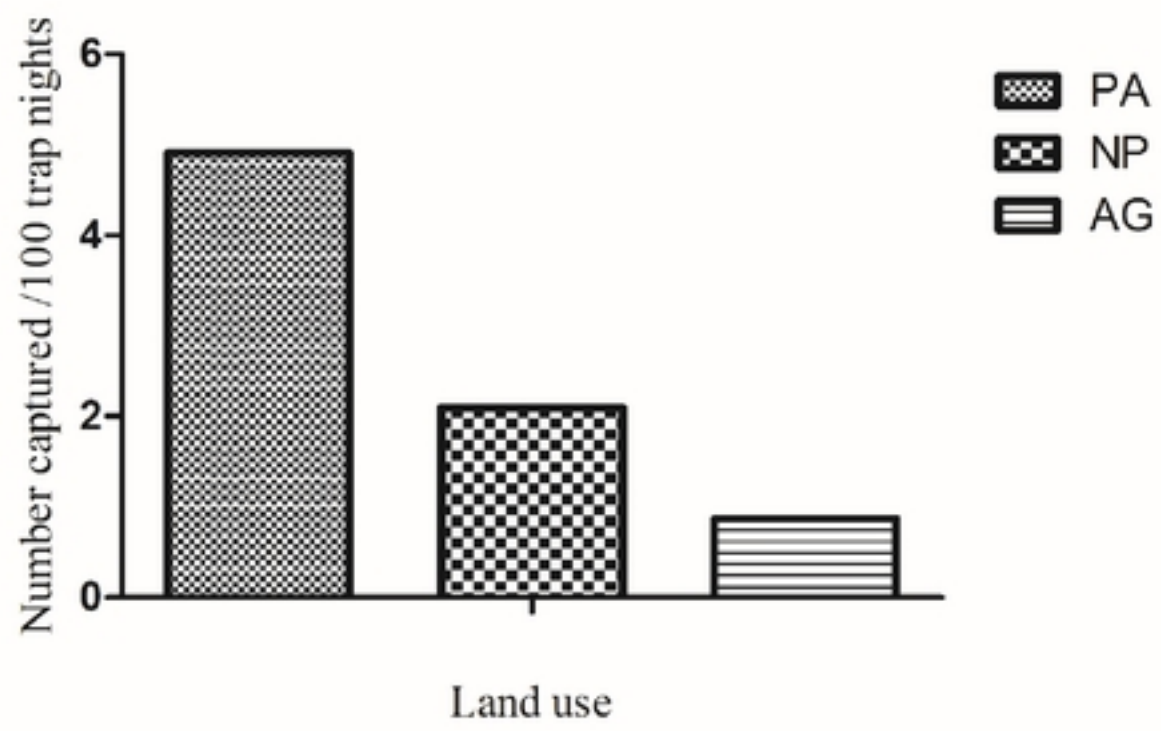

bioRxiv preprint doi: <https://doi.org/10.1101/727206>; this version posted August 6, 2019. The copyright holder for this preprint (which was not certified by peer review) is the author/funder, who has granted bioRxiv a license to display the preprint in perpetuity. It is made available under a [CC-BY 4.0 International license](#).

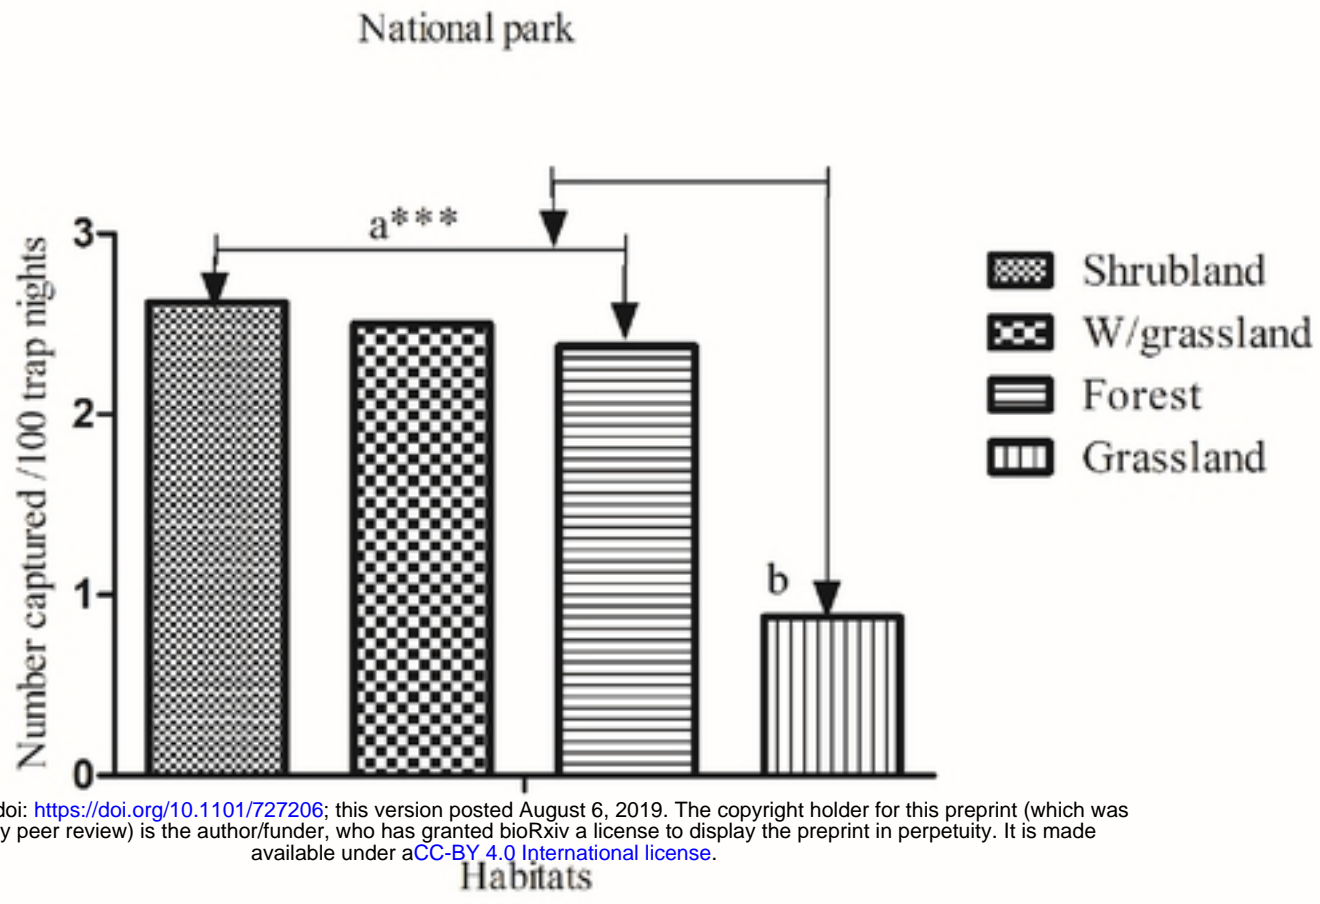

bioRxiv preprint doi: <https://doi.org/10.1101/727206>; this version posted August 6, 2019. The copyright holder for this preprint (which was not certified by peer review) is the author/funder, who has granted bioRxiv a license to display the preprint in perpetuity. It is made available under a [CC-BY 4.0 International license](https://creativecommons.org/licenses/by/4.0/).

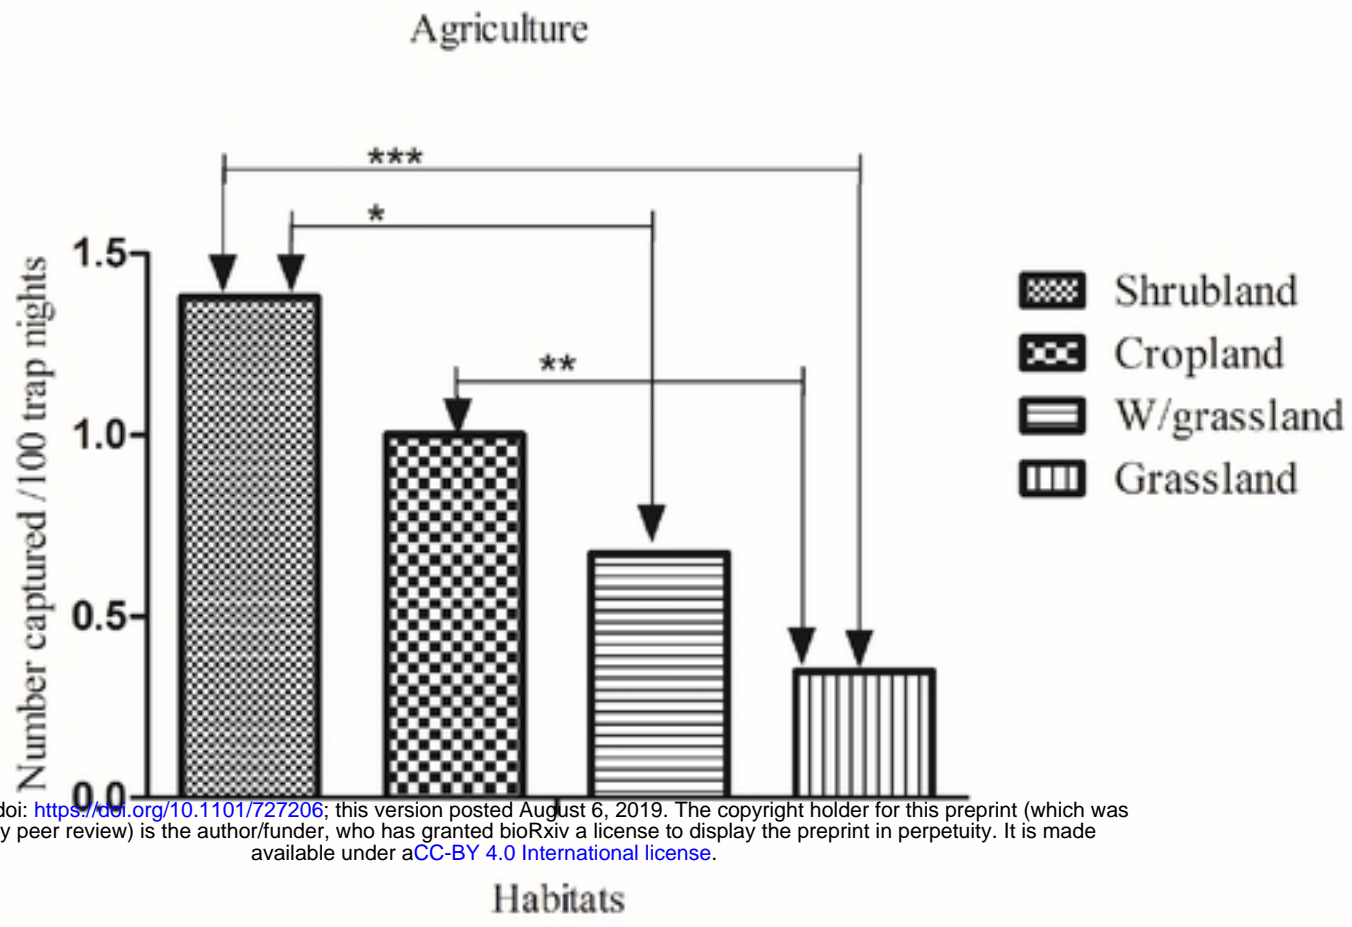

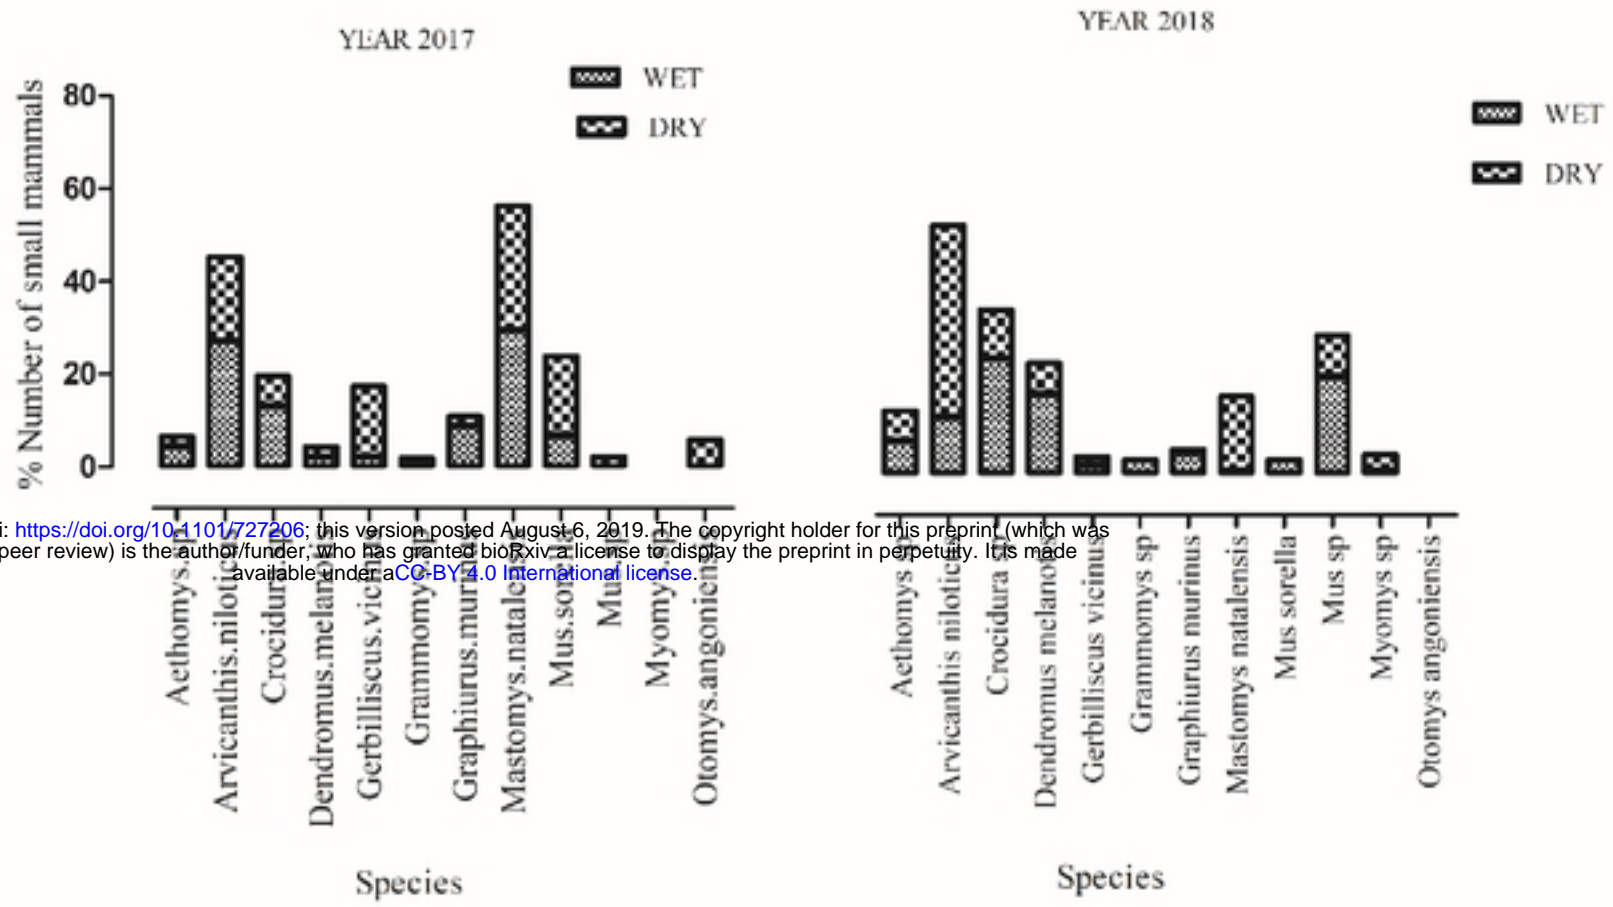

bioRxiv preprint doi: <https://doi.org/10.1101/727206>; this version posted August 6, 2019. The copyright holder for this preprint (which was not certified by peer review) is the author/funder, who has granted bioRxiv a license to display the preprint in perpetuity. It is made available under aCC-BY 4.0 International license.
